# Supplementary material for: Deep Learning-Based MRI Segmentation for Non-Invasive Prediction of Microsatellite Instability in Endometrial Cancer: A Multicenter Study
Source: Research Square preprint supplement (doi:10.21203/rs.3.rs-8106086/v1), 2025-12-30
Supplement: Supplementary file 1 [file 7d25ff35b8bc5fb490531bfd.docx]

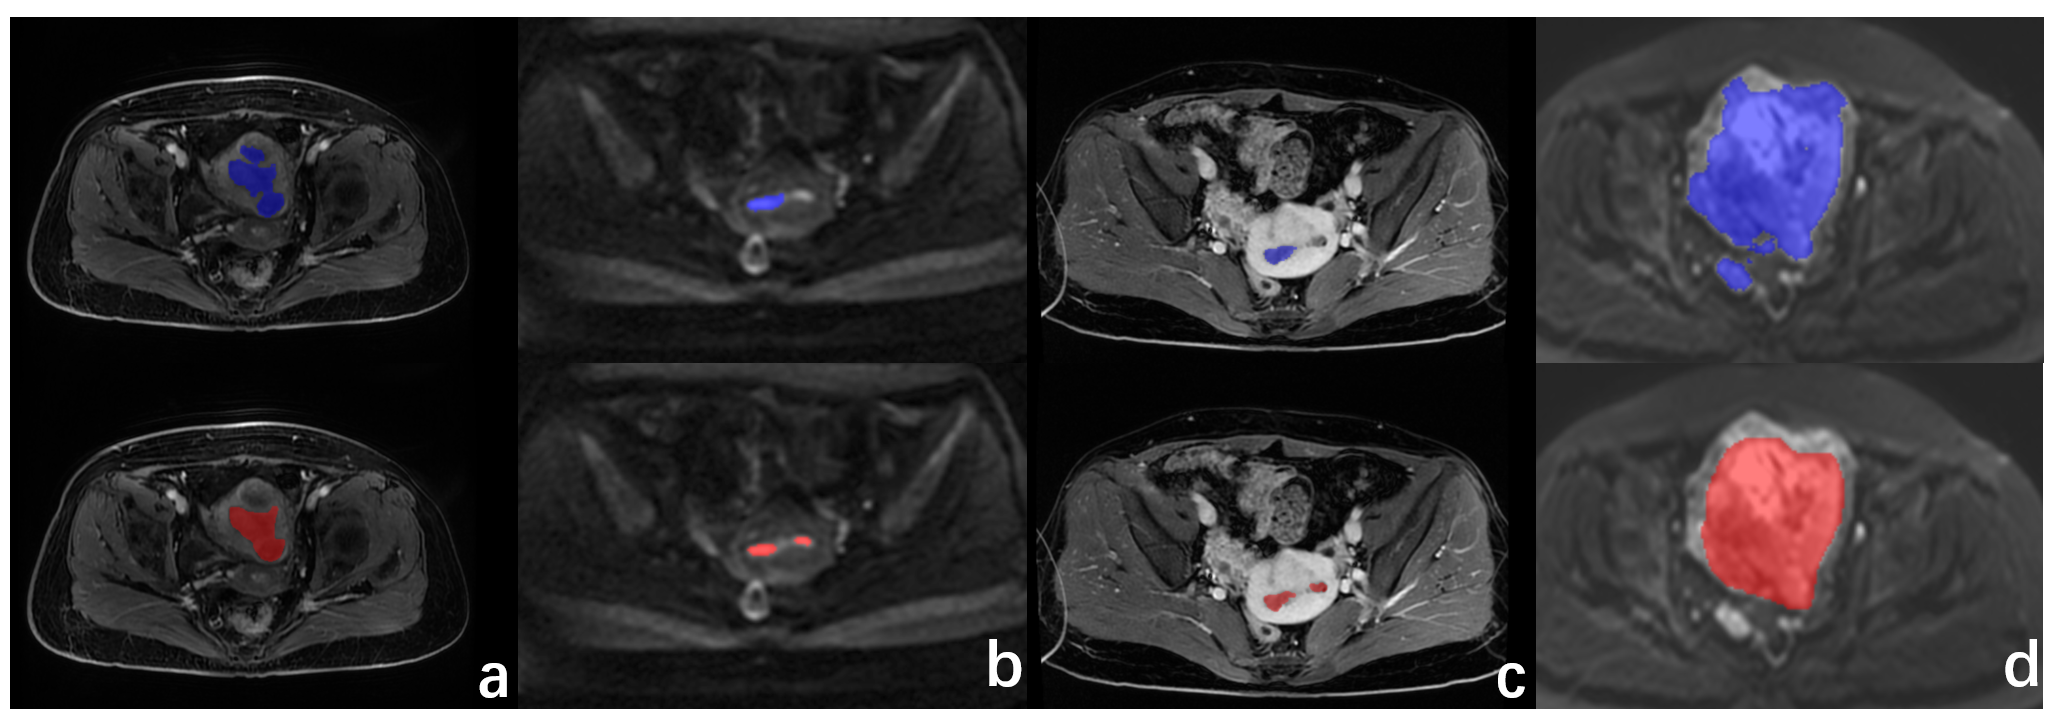


**Supplementary Fig. S1:** Examples of automatic segmentation failure (a-d; blue: automatically segmented ROIs; red: manually segmented ROIs). **(a)** (T2WI): Non-endometrial carcinoma (EC) lesions were incorrectly identified as EC. **(b)** (DWI), **(c)** (CE-T1WI): Slight discrepancies in small lesions resulted in significantly reduced Dice similarity coefficient (DSC) values. **(d):** Lymph node metastasis was misidentified as an EC ROI.


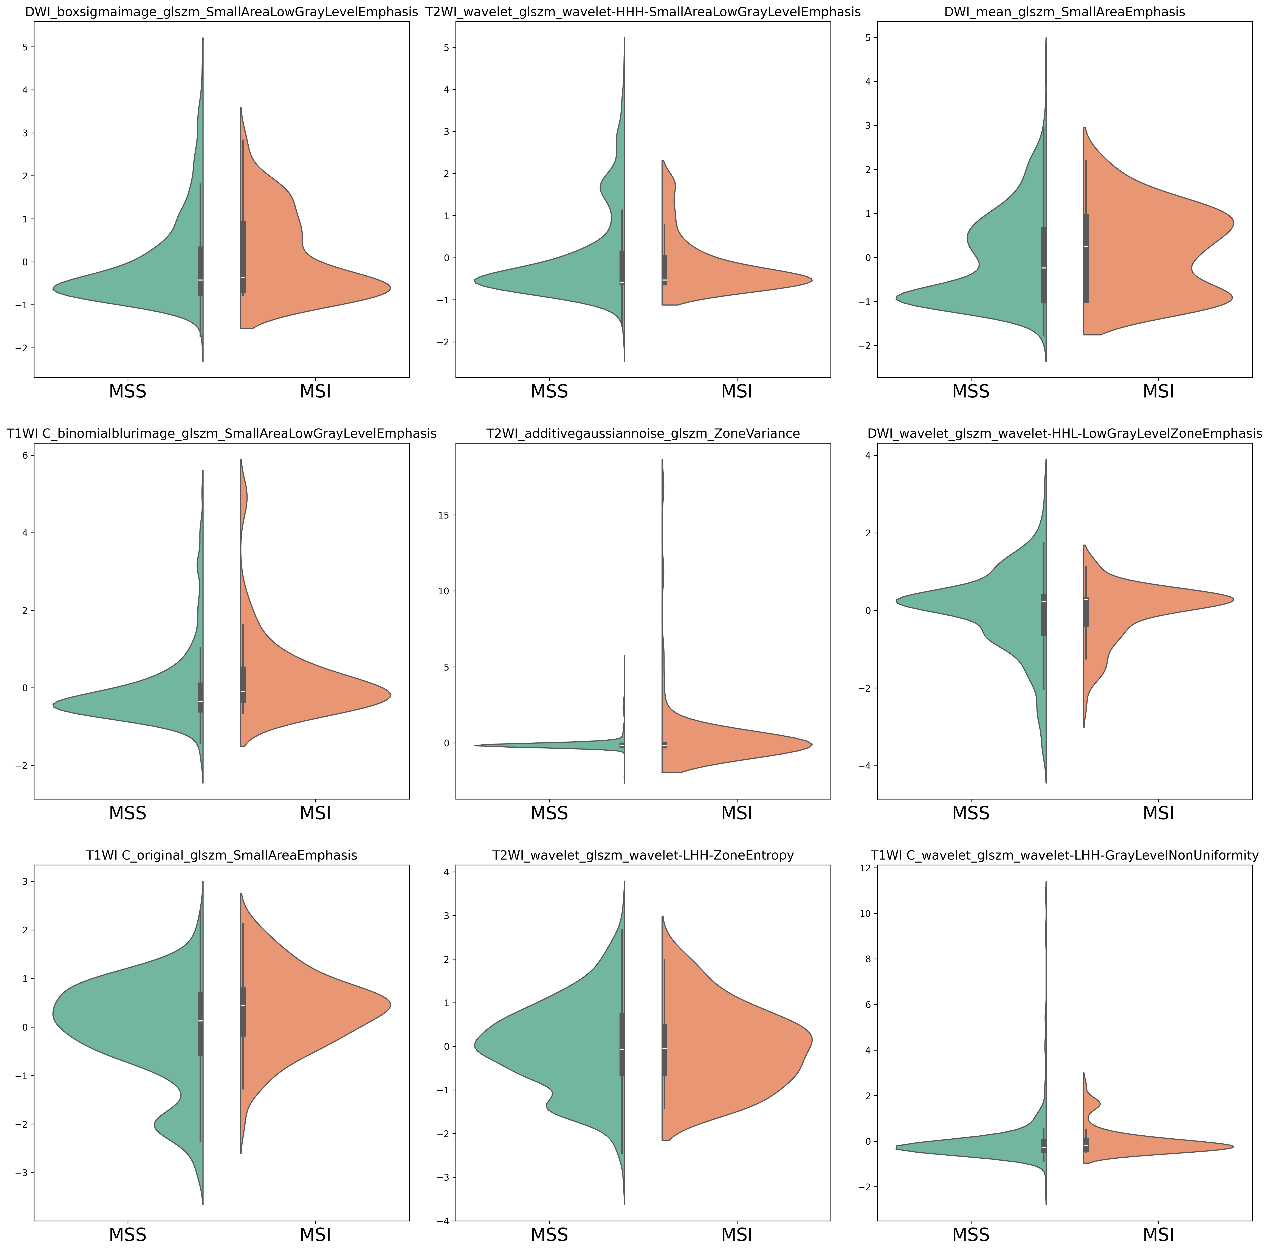


Supplementary Fig. S2: Violin plots of GLSZM features in the MSI and MSS groups.
